# Supplementary material for: The mechanism of excited state proton dissociation in microhydrated hydroxylamine clusters
Source: Royal Society of Chemistry journal article supplement (doi:10.1039/c5cp07396k), 2016-01-01

**Table S2** Selected Z-matrices of the static and dynamic equilibrium structures of the intermediate complexes in the  $S_0$  and  $S_1$  states obtained from DFT/B3LYP/aug-cc-pVDZ geometry optimizations and sampled from NVT-BOMD simulations at the TD-DFT/B3LYP/aug-cc-pVDZ level, respectively. The Z-matrices of the remaining structures can be sent upon request.

**G1-[1]**

|   |   |    |   |    |   |    |
|---|---|----|---|----|---|----|
| N |   |    |   |    |   |    |
| H | 1 | B1 |   |    |   |    |
| H | 1 | B2 | 2 | A1 |   |    |
| O | 1 | B3 | 2 | A2 | 3 | D1 |
| H | 4 | B4 | 1 | A3 | 2 | D2 |
| H | 1 | B5 | 4 | A4 | 5 | D3 |
| O | 1 | B6 | 4 | A5 | 5 | D4 |
| H | 7 | B7 | 1 | A6 | 4 | D5 |

|    |              |
|----|--------------|
| B1 | 1.02165601   |
| B2 | 1.02172697   |
| B3 | 1.43922688   |
| B4 | 0.97358205   |
| B5 | 3.38861506   |
| B6 | 2.78941607   |
| B7 | 0.97942585   |
| A1 | 106.21155535 |
| A2 | 104.50988309 |
| A3 | 102.29914886 |
| A4 | 83.81457446  |
| A5 | 78.54715534  |
| A6 | 26.87533992  |
| D1 | 110.40315621 |
| D2 | 126.56307384 |
| D3 | 11.59623587  |
| D4 | -1.66968342  |
| D5 | 172.18496761 |

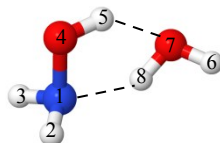

**E1-[1]**

|   |   |    |   |    |   |    |
|---|---|----|---|----|---|----|
| N |   |    |   |    |   |    |
| H | 1 | B1 |   |    |   |    |
| H | 1 | B2 | 2 | A1 |   |    |
| O | 1 | B3 | 2 | A2 | 3 | D1 |
| H | 4 | B4 | 1 | A3 | 2 | D2 |
| H | 4 | B5 | 1 | A4 | 2 | D3 |
| O | 4 | B6 | 1 | A5 | 2 | D4 |
| H | 7 | B7 | 4 | A6 | 1 | D5 |

|    |            |
|----|------------|
| B1 | 1.00611182 |
| B2 | 1.05757127 |
| B3 | 1.30261583 |
| B4 | 1.34890474 |
| B5 | 2.95563631 |
| B6 | 2.40498212 |

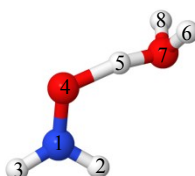

|    |              |
|----|--------------|
| B7 | 1.08010786   |
| A1 | 119.90991514 |
| A2 | 114.44142409 |
| A3 | 115.12885382 |
| A4 | 118.56929576 |
| A5 | 107.60394013 |
| A6 | 113.80133926 |
| D1 | 154.54582312 |
| D2 | 20.65729013  |
| D3 | 11.66237886  |
| D4 | 26.43825912  |
| D5 | 108.62664189 |

### G1-[2]

|   |   |    |   |    |   |    |
|---|---|----|---|----|---|----|
| N |   |    |   |    |   |    |
| H | 1 | B1 |   |    |   |    |
| H | 1 | B2 | 2 | A1 |   |    |
| O | 1 | B3 | 2 | A2 | 3 | D1 |
| H | 4 | B4 | 1 | A3 | 2 | D2 |
| O | 4 | B5 | 1 | A4 | 2 | D3 |
| H | 6 | B6 | 4 | A5 | 1 | D4 |
| H | 6 | B7 | 4 | A6 | 1 | D5 |

|    |               |
|----|---------------|
| B1 | 1.02126637    |
| B2 | 1.02283967    |
| B3 | 1.45250852    |
| B4 | 0.96489481    |
| B5 | 2.81421854    |
| B6 | 0.97341975    |
| B7 | 0.96286396    |
| A1 | 105.76382284  |
| A2 | 103.26534016  |
| A3 | 102.89001678  |
| A4 | 87.61143531   |
| A5 | 22.79069170   |
| A6 | 127.04587158  |
| D1 | 108.40069560  |
| D2 | 126.75005207  |
| D3 | -104.72865818 |
| D4 | -173.35120157 |
| D5 | -149.64134385 |

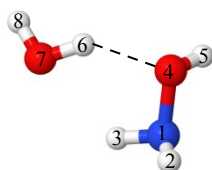

### E1-[2]

|   |   |    |   |    |   |    |
|---|---|----|---|----|---|----|
| N |   |    |   |    |   |    |
| H | 1 | B1 |   |    |   |    |
| H | 1 | B2 | 2 | A1 |   |    |
| O | 1 | B3 | 2 | A2 | 3 | D1 |
| H | 4 | B4 | 1 | A3 | 2 | D2 |
| O | 1 | B5 | 4 | A4 | 5 | D3 |
| H | 6 | B6 | 1 | A5 | 4 | D4 |
| H | 6 | B7 | 1 | A6 | 4 | D5 |

|    |            |
|----|------------|
| B1 | 1.04437972 |
| B2 | 1.32504490 |

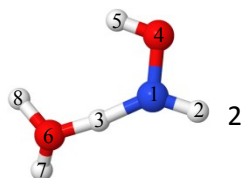

|    |               |
|----|---------------|
| B3 | 1.34608952    |
| B4 | 0.98513654    |
| B5 | 2.46365156    |
| B6 | 0.98946905    |
| B7 | 1.13634898    |
| A1 | 137.03450336  |
| A2 | 102.94451621  |
| A3 | 104.69053774  |
| A4 | 116.09855113  |
| A5 | 122.91878176  |
| A6 | 111.55002689  |
| D1 | -171.80154414 |
| D2 | 176.54791968  |
| D3 | 0.74887120    |
| D4 | 141.65717726  |
| D5 | 15.39496187   |

G2-[2]

|   |   |     |   |    |   |    |
|---|---|-----|---|----|---|----|
| N |   |     |   |    |   |    |
| H | 1 | B1  |   |    |   |    |
| H | 1 | B2  | 2 | A1 |   |    |
| O | 1 | B3  | 3 | A2 | 2 | D1 |
| H | 4 | B4  | 1 | A3 | 3 | D2 |
| H | 4 | B5  | 1 | A4 | 3 | D3 |
| O | 4 | B6  | 1 | A5 | 3 | D4 |
| H | 7 | B7  | 4 | A6 | 1 | D5 |
| O | 7 | B8  | 4 | A7 | 1 | D6 |
| H | 9 | B9  | 7 | A8 | 4 | D7 |
| H | 9 | B10 | 7 | A9 | 4 | D8 |

|     |               |
|-----|---------------|
| B1  | 1.02226269    |
| B2  | 1.02083348    |
| B3  | 1.44001562    |
| B4  | 0.97813292    |
| B5  | 3.43948412    |
| B6  | 2.79528067    |
| B7  | 0.97375254    |
| B8  | 2.90614160    |
| B9  | 0.96615216    |
| B10 | 0.96590942    |
| A1  | 105.99953660  |
| A2  | 104.48048937  |
| A3  | 101.64312320  |
| A4  | 79.31148059   |
| A5  | 77.47606030   |
| A6  | 63.68829749   |
| A7  | 126.80376057  |
| A8  | 110.92341715  |
| A9  | 109.42332095  |
| D1  | -110.19805097 |
| D2  | -126.79826224 |
| D3  | -114.00650351 |
| D4  | -127.64668610 |
| D5  | 4.16503004    |
| D6  | 102.25270443  |

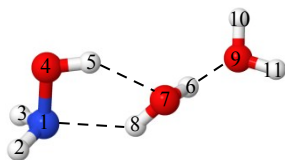

D7 52.76810885  
 D8 168.31804844

**E2-[2]**

|   |   |     |   |    |    |
|---|---|-----|---|----|----|
| N |   |     |   |    |    |
| H | 1 | B1  |   |    |    |
| H | 1 | B2  | 2 | A1 |    |
| O | 1 | B3  | 3 | A2 | D1 |
| H | 4 | B4  | 1 | A3 | D2 |
| H | 4 | B5  | 1 | A4 | D3 |
| O | 4 | B6  | 1 | A5 | D4 |
| H | 7 | B7  | 4 | A6 | D5 |
| O | 7 | B8  | 4 | A7 | D6 |
| H | 9 | B9  | 7 | A8 | D7 |
| H | 9 | B10 | 7 | A9 | D8 |

|     |               |
|-----|---------------|
| B1  | 1.04526791    |
| B2  | 1.02104456    |
| B3  | 1.28519181    |
| B4  | 1.22348233    |
| B5  | 3.19239315    |
| B6  | 2.36443841    |
| B7  | 0.96547708    |
| B8  | 2.48598069    |
| B9  | 1.02587426    |
| B10 | 0.97876351    |
| A1  | 117.69650154  |
| A2  | 113.11909711  |
| A3  | 111.23014020  |
| A4  | 109.13064042  |
| A5  | 108.03597630  |
| A6  | 122.07669802  |
| A7  | 125.99781576  |
| A8  | 127.54984326  |
| A9  | 120.44476053  |
| D1  | -144.55777764 |
| D2  | 169.60910954  |
| D3  | -171.03321524 |
| D4  | 170.35695463  |
| D5  | -101.59855320 |
| D6  | 97.04235481   |
| D7  | -105.62657339 |
| D8  | 39.30238889   |

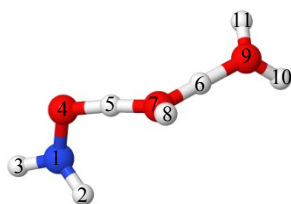

Supplement: c5cp07396k8.pdf [file c5cp07396k8.pdf]
