# Supplementary material for: The mechanism of excited state proton dissociation in microhydrated hydroxylamine clusters
Source: Royal Society of Chemistry journal article supplement (doi:10.1039/c5cp07396k), 2016-01-01
Supplement: c5cp07396k6.pdf [file c5cp07396k6.pdf]

***Supplementary Section***

*for*

***Mechanism of excited state proton dissociation in  
microhydrated hydroxylamine clusters***

*Jittima Thisuwan, Parichart Suwannakham, Charoensak Lao-ngam  
and Kritsana Sagarik\**

*School of Chemistry, Institute of Science  
Suranaree University of Technology, Nakhon Ratchasima 30000,  
Thailand*

- Table S1** Equilibrium structures of the intermediate complexes for proton dissociation and transfer in  $\text{NH}_2\text{OH}(\text{H}_2\text{O})_n$  ( $n = 1-4$ ) in the  $S_0$  and  $S_1$  states. The  $S_0$  state structures were obtained from DFT/B3LYP/aug-cc-pVDZ geometry optimizations and those in the  $S_1$  state were representative dynamic equilibrium structures sampled from NVT-BOMD simulations at the TD-DFT/B3LYP/aug-cc-pVDZ level. The total energies ( $E^{\text{Tot}}$ ) and H-bond distances ( $R_{\text{O-O}}$ ,  $R_{\text{N-O}}$  and  $\Delta d_{\text{DA}}$ ) are in au and Å, respectively. The excitation energies ( $E^{\text{Ex,[A]}}$  and  $E^{\text{Ex,[B]}}$ ) and vibrational frequencies are in eV and  $\text{cm}^{-1}$ , respectively.
- Table S2** Selected Z-matrices of the static and dynamic equilibrium structures of the intermediate complexes in the  $S_0$  and  $S_1$  states obtained from DFT/B3LYP/aug-cc-pVDZ geometry optimizations and sampled from NVT-BOMD simulations at the TD-DFT/B3LYP/aug-cc-pVDZ level, respectively.
- Table S3** Drifts in the energies, temperature and velocity of proton in structure **E1-[1]** in the  $S_1$  state obtained from NVT-BOMD simulations at 250 K. Energies and velocity are in atomic unit (au) and temperature is in K.
- Table S4** Drifts in the energies, temperature and velocity of proton in structure **E1-[1]** in the  $S_1$  state obtained from NVT-BOMD simulations at 350 K. Energies and velocity are in atomic unit (au) and temperature is in K.
- Table S5** Averages of properties ( $\langle A \rangle$ ) and the corresponding standard deviations ( $\sigma_A$ ) obtained from NVT-BOMD simulations on structure **E1-[1]** in the  $S_1$  state at 298 K. **P1** and **P2** are for the large- and small-amplitude O-O vibrations, respectively.
- Table S6** Averages of properties ( $\langle A \rangle$ ) and the corresponding standard deviations ( $\sigma_A$ ) obtained from NVT-BOMD simulations on structure **E1-[1]** in the  $S_1$  state at 500 K. **P1** and **P2** are for the large- and small-amplitude O-O vibrations, respectively.
- Table S7** Average lowest singlet-excitation ( $\langle E^{\text{Ex}} \rangle$ ) and kinetic ( $\langle E^{\text{Kin}} \rangle$ ) energies and the corresponding standard deviations ( $\sigma_E^{\text{Ex}}$  and  $\sigma_E^{\text{Kin}}$ , respectively) of structure **E1-[1]** obtained from NVT-BOMD simulations over the temperature range of 250-500 K.
- Table S8** Kinetics of proton dissociation in the smallest intermediate complex (structure **E1-[1]**) in the  $S_1$  state obtained from NVT-BOMD simulations over the temperature range of 250-400 K. Lifetimes ( $\tau$ ) and first order-rate constants ( $k$ ) are in fs and  $\text{ps}^{-1}$ , respectively.
- Table S9** Kinetics of proton dissociation in the smallest intermediate complex (structure **E1-[1]**) in the  $S_1$  state obtained from BOMD simulations over the temperature range of 250-500 K. **P1** and **P2** are the dynamics for the large- and small-amplitude O-O vibrations, respectively. Lifetimes ( $\tau$ ) and first order-rate constants ( $k$ ) are in fs and  $\text{ps}^{-1}$ , respectively.
- Figure S1** Spatial distributions of the HOMO and LUMO wavefunctions of the isolated  $\text{NH}_2\text{OH}$  and the intermediate complexes in Fig. 1. The values of the HOMO and LUMO isosurfaces are 0.10 and 0.04, respectively. a) Isolated  $\text{NH}_2\text{OH}$  in  $\epsilon = 1$  and  $\epsilon = 78$ . b) – c) The intermediate complexes in  $\epsilon = 1$  and 78, respectively.

**Figure S2** Energy profile of the potential energy surface for proton displacement in structure **E1-[1]** in the  $S_1$  states ( $\epsilon = 1$ ) computed with and without non-adiabatic effects.  $\Delta d_{DA}$  = asymmetric stretching coordinate ( $\text{\AA}$ );  $R_{O-O}$  = H-bond distance ( $\text{\AA}$ );  $[B]^*$  = minimum on the  $S_1$  state surface.

**Figure S3** Variations of temperature ( $T$ ), potential energy ( $E^{\text{Pot}}$ ), vertical excitation energy ( $E^{\text{Ex}}$ ), and the H-bond distances ( $R_{O-O}$  and  $R_{O-H}$ ) as a function of the simulation time, obtained from NVT-BOMD simulations on structure **E1-[1]** at 298 and 500 K. **P1** and **P2** are examples of the large- (L) and small-(S) amplitude O-O vibrations, respectively. Distances and energies are in  $\text{\AA}$  and atomic unit (au), respectively. a) 298 K (400-700 fs), b) 500 K (250-1200 fs).
