# Supplementary material for: The mechanism of excited state proton dissociation in microhydrated hydroxylamine clusters
Source: Royal Society of Chemistry journal article supplement (doi:10.1039/c5cp07396k), 2016-01-01
Supplement: c5cp07396k7.pdf [file c5cp07396k7.pdf]

**Table S1** Equilibrium structures of the intermediate complexes for proton dissociation and transfer in  $\text{NH}_2\text{OH}(\text{H}_2\text{O})_n$  ( $n = 1-4$ ) in the  $S_0$  and  $S_1$  states. The  $S_0$  state structures were obtained from DFT/B3LYP/aug-cc-pVDZ geometry optimizations and those in the  $S_1$  state were representative dynamic equilibrium structures sampled from NVT-BOMD simulations at the TD-DFT/B3LYP/aug-cc-pVDZ level. The total energies ( $E^{\text{Tot}}$ ) and H-bond distances ( $R_{\text{O-O}}$ ,  $R_{\text{N-O}}$  and  $\Delta d_{\text{DA}}$ ) are in au and Å, respectively. The excitation energies ( $E^{\text{Ex,[A]}}$  and  $E^{\text{Ex,[B]}}$ ) and vibrational frequencies are in eV and  $\text{cm}^{-1}$ , respectively.

| Ground state                                                                                         | Excited state                                                                                        | $E^{\text{Tot}}$             | $E^{\text{Ex,[A]}}$ | $E^{\text{Ex,[B]}}$ | H-bond                   | $R_{\text{X-O}}$                                        | $\Delta d_{\text{DA}}$                                     | $\nu^{\text{X-H}}$                           |
|------------------------------------------------------------------------------------------------------|------------------------------------------------------------------------------------------------------|------------------------------|---------------------|---------------------|--------------------------|---------------------------------------------------------|------------------------------------------------------------|----------------------------------------------|
| <b>G1-[1]</b><br>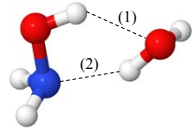   | <b>E1-[1]</b><br>   | -208.097229<br>(-207.989814) | (1.87)              | (0.22)              | (1)<br>(2)               | 2.87 (2.40)<br>2.79 ( - )                               | 1.12 (-0.15)<br>0.99 ( - )                                 | 3535 (-)<br>3718 (-)                         |
| <b>G1-[2]</b><br>   | <b>E1-[2]</b><br>   | -208.093684<br>(-207.969018) | (1.69)              | (0.03)              | (1)<br>(2)               | 2.81 ( - )<br>- (2.46)                                  | 0.98 ( - )<br>- (-0.17)                                    | 3732 (-)                                     |
| <b>G2-[1]</b><br>  | <b>E2-[1]</b><br>  | -284.513796<br>(-284.069232) | (1.39)              | (0.26)              | (1)<br>(2)<br>(3)<br>(4) | 2.81 (2.43)<br>2.78 ( - )<br>2.81 (2.90)<br>3.04 (2.77) | 1.02 (-0.03)<br>1.00 ( - )<br>1.00 (-1.24)<br>1.28 (-0.89) | 3522 (-)<br>3719 (-)<br>3729 (-)<br>3376 (-) |
| <b>G2-[2]</b><br> | <b>E2-[2]</b><br> | -284.511974<br>(-284.411815) | (1.04)<br>(0.68)    | (0.07)              | (1)<br>(2)<br>(3)        | 2.79 (2.36)<br>2.85 ( - )<br>2.91 (2.49)                | 0.96 (-0.07)<br>1.15 ( - )<br>0.97 (0.49)                  | 3449 (-)<br>3582 (-)<br>3582 (-)             |

Table S1 (cont.)

| Ground state      | Excited state     | $E^{\text{Tot}}$             | $E^{\text{Ex,[A]}}$ | $E^{\text{Ex,[B]}}$ | H-bond                                 | $R_{\text{X-O}}$                                                                      | $\Delta d_{\text{DA}}$                                                                     | $\nu^{\text{X-H}}$                                                   |
|-------------------|-------------------|------------------------------|---------------------|---------------------|----------------------------------------|---------------------------------------------------------------------------------------|--------------------------------------------------------------------------------------------|----------------------------------------------------------------------|
| <b>G3-[1]</b><br> | <b>E3-[1]</b><br> | -360.935738<br>(-360.821527) | (1.62)              | (0.15)              | (1)<br>(2)<br>(3)<br>(4)<br>(5)        | 2.78 (2.44)<br>3.04 (2.84)<br>2.81 (2.82)<br>2.77 (2.75)<br>2.77 ( - )                | 1.00 (-0.24)<br>1.00 (-0.82)<br>0.86 (-0.94)<br>0.85 (-0.86)<br>0.99 ( - )                 | 3485 (-)<br>3362 (-)<br>3717 (-)<br>3721 (-)<br>3720 (-)             |
| <b>G4-[1]</b><br> | <b>E4-[1]</b><br> | -437.351475<br>(-437.244843) | (1.22)              | (0.19)              | (1)<br>(2)<br>(3)<br>(4)<br>(5)<br>(6) | 2.73 (2.52)<br>3.07 (2.80)<br>2.76 (2.97)<br>2.84 ( - )<br>2.89 (2.62)<br>2.77 (2.74) | 0.88 (-0.06)<br>1.03 (-0.83)<br>0.82 (-1.30)<br>1.17 ( - )<br>0.95 (-0.45)<br>0.85 (-0.83) | 3506 (-)<br>3365 (-)<br>3719 (-)<br>3576 (-)<br>3576 (-)<br>3720 (-) |

(...) = values for the dynamic equilibrium structures in the  $S_1$  state.

\* = H-bond susceptible to proton dissociation.

X = O or N atom.
