# Supplementary material for: The mechanism of excited state proton dissociation in microhydrated hydroxylamine clusters
Source: Royal Society of Chemistry journal article supplement (doi:10.1039/c5cp07396k), 2016-01-01
Supplement: c5cp07396k9.pdf [file c5cp07396k9.pdf]

**Table S3** Drifts in the energies, temperature and velocity of proton in structure **E1-[1]** in the  $S_1$  state obtained from NVT-BOMD simulations at 250 K. Energies and velocity are in atomic unit (au) and temperature is in K.

| <b>Property A</b> | $\delta_A$ | $\langle A \rangle$ | $\sigma_A$ |
|-------------------|------------|---------------------|------------|
| $E^{\text{Tot}}$  | 0.0566     | -207.9748           | 0.0040     |
| $E^{\text{Pot}}$  | 0.0639     | -207.9819           | 0.0030     |
| $E^{\text{Kin}}$  | 0.0130     | 0.0071              | 0.0030     |
| $v^{\text{H}^+}$  | -0.5205    | 0.0012              | 0.0005     |
| T                 | 0.0130     | 248.4               | 104.00     |

$\delta_A$  = drift in property A;  $\langle A \rangle$  = average of property A;  $\sigma_A$  = SD of property A;  $E^{\text{tot}}$  = total energy;  $E^{\text{pot}}$  = potential energy;  $E^{\text{kin}}$  = kinetic energy;  $v^{\text{H}^+}$  = velocity of proton in H-bond; T = temperature.
