# Supplementary material for: The mechanism of excited state proton dissociation in microhydrated hydroxylamine clusters
Source: Royal Society of Chemistry journal article supplement (doi:10.1039/c5cp07396k), 2016-01-01
Supplement: c5cp07396k11.pdf [file c5cp07396k11.pdf]

**Table S5** Averages of properties ( $\langle A \rangle$ ) and the corresponding standard deviations ( $\sigma_A$ ) obtained from NVT-BOMD simulations on structure **E1-[1]** in the  $S_1$  state at 298 K. **P1** and **P2** are for the large- and small-amplitude O-O vibrations, respectively.

| Property A        | P1                  |            | P2                  |            |
|-------------------|---------------------|------------|---------------------|------------|
|                   | $\langle A \rangle$ | $\sigma_A$ | $\langle A \rangle$ | $\sigma_A$ |
| T                 | 298                 | 135        | 302                 | 151        |
| $E^{\text{Tot}}$  | -207.9721           | 0.0043     | -207.9712           | 0.0052     |
| $E^{\text{Pot}}$  | -207.9806           | 0.0030     | -207.9798           | 0.0042     |
| $E^{\text{Kin}}$  | 0.0085              | 0.0038     | 0.0086              | 0.0043     |
| $E^{\text{Ex}}$   | 0.0188              | 0.0113     | 0.0280              | 0.0185     |
| $E^{\text{Nosé}}$ | 0.0007              | 0.0010     | 0.0011              | 0.0014     |
| $R_{\text{O-O}}$  | 2.43                | 0.043      | 2.45                | 0.018      |
| $R_{\text{O-H}}$  | 1.18                | 0.058      | 1.23                | 0.089      |
| $R_{\text{O..H}}$ | 1.27                | 0.063      | 1.23                | 0.091      |

T = temperature;  $E^{\text{Tot}}$  = total energy;  $E^{\text{Pot}}$  = potential energy;  $E^{\text{Kin}}$  = kinetic energy;  $E^{\text{Ex}}$  = excitation energy;  $E^{\text{Nosé}}$  = kinetic energy of the Nosé-Hoover thermostat bath;  $R_{\text{O-O}}$  and  $R_{\text{O-H}}$  = H-bond distances. Energies and temperatures are in au and K, respectively, and H-bond distances are in Å.
