# Supplementary material for: The mechanism of excited state proton dissociation in microhydrated hydroxylamine clusters
Source: Royal Society of Chemistry journal article supplement (doi:10.1039/c5cp07396k), 2016-01-01
Supplement: c5cp07396k12.pdf [file c5cp07396k12.pdf]

**Table S6** Averages of properties ( $\langle A \rangle$ ) and the corresponding standard deviations ( $\sigma_A$ ) obtained from NVT-BOMD simulations on structure **E1-[1]** in the  $S_1$  state at 500 K. **P1** and **P2** are for the large- and small-amplitude O-O vibrations, respectively.

| Property A        | P1                  |            | P2                  |            |
|-------------------|---------------------|------------|---------------------|------------|
|                   | $\langle A \rangle$ | $\sigma_A$ | $\langle A \rangle$ | $\sigma_A$ |
| T                 | 500                 | 170        | 497                 | 186        |
| $E^{\text{Tot}}$  | -207.9592           | 0.0075     | -207.9596           | 0.0076     |
| $E^{\text{Pot}}$  | -207.9734           | 0.0053     | -207.9738           | 0.0058     |
| $E^{\text{Kin}}$  | 0.0143              | 0.0049     | 0.0142              | 0.0053     |
| $E^{\text{Ex}}$   | 0.0186              | 0.0274     | 0.0154              | 0.0256     |
| $E^{\text{Nosé}}$ | 0.0010              | 0.0014     | 0.0010              | 0.0013     |
| $R_{\text{O-O}}$  | 2.47                | 0.089      | 2.44                | 0.046      |
| $R_{\text{O-H}}$  | 1.21                | 0.109      | 1.21                | 0.087      |
| $R_{\text{O..H}}$ | 1.27                | 0.118      | 1.25                | 0.086      |

T = temperature;  $E^{\text{Tot}}$  = total energy;  $E^{\text{Pot}}$  = potential energy;  $E^{\text{Kin}}$  = kinetic energy;  $E^{\text{Ex}}$  = excitation energy;  $E^{\text{Nosé}}$  = kinetic energy of the Nosé-Hoover thermostat bath;  $R_{\text{O-O}}$  and  $R_{\text{O-H}}$  = H-bond distances. Energies and temperatures are in au and K, respectively, and H-bond distances are in Å.
