# Supplementary material for: The mechanism of excited state proton dissociation in microhydrated hydroxylamine clusters
Source: Royal Society of Chemistry journal article supplement (doi:10.1039/c5cp07396k), 2016-01-01
Supplement: c5cp07396k13.pdf [file c5cp07396k13.pdf]

**Table S7** Average lowest singlet-excitation ( $\langle E^{\text{Ex}} \rangle$ ) and kinetic ( $\langle E^{\text{Kin}} \rangle$ ) energies and the corresponding standard deviations ( $\sigma_{E^{\text{Ex}}}$  and  $\sigma_{E^{\text{Kin}}}$ , respectively) of structure **E1-[1]** obtained from NVT-BOMD simulations over the temperature range of 250-500 K.

| T   | $\langle E^{\text{Ex}} \rangle$ | $\sigma_{E^{\text{Ex}}}$ | $\langle E^{\text{Kin}} \rangle$ | $\sigma_{E^{\text{Kin}}}$ | $\langle E^{\text{Ex}} \rangle / \langle E^{\text{Kin}} \rangle$ |
|-----|---------------------------------|--------------------------|----------------------------------|---------------------------|------------------------------------------------------------------|
| 250 | 0.0185                          | 0.0114                   | 0.0071                           | 0.0030                    | 2.6145                                                           |
| 298 | 0.0222                          | 0.0147                   | 0.0084                           | 0.0044                    | 2.6361                                                           |
| 320 | 0.0213                          | 0.0140                   | 0.0091                           | 0.0056                    | 2.3440                                                           |
| 350 | 0.0241                          | 0.0146                   | 0.0099                           | 0.0048                    | 2.4350                                                           |
| 400 | 0.0254                          | 0.0162                   | 0.0113                           | 0.0061                    | 2.2393                                                           |
| 500 | 0.0271                          | 0.0172                   | 0.0142                           | 0.0054                    | 1.9044                                                           |

Energies and temperatures are in atomic unit (au) and K, respectively.
