# Supplementary material for: The mechanism of excited state proton dissociation in microhydrated hydroxylamine clusters
Source: Royal Society of Chemistry journal article supplement (doi:10.1039/c5cp07396k), 2016-01-01
Supplement: c5cp07396k14.pdf [file c5cp07396k14.pdf]

**Table S8** Kinetics of proton dissociation in the smallest intermediate complex (structure **E1-[1]**) in the  $S_1$  state obtained from NVT-BOMD simulations over the temperature range of 250-400 K. Lifetimes ( $\tau$ ) and first order-rate constants ( $k$ ) are in fs and  $\text{ps}^{-1}$ , respectively.

| <b>T</b> | <b><math>\tau_{1/2}</math></b> | <b>k</b> | <b><math>\tau = 1/k</math></b> | <b>ln k</b> |
|----------|--------------------------------|----------|--------------------------------|-------------|
| 250      | 62                             | 11.2     | 89                             | 2.42        |
| 298      | 54                             | 12.8     | 78                             | 2.55        |
| 320      | 54                             | 12.9     | 78                             | 2.55        |
| 350      | 52                             | 13.4     | 74                             | 2.60        |
| 400      | 50                             | 13.8     | 73                             | 2.62        |
