# Supplementary material for: The mechanism of excited state proton dissociation in microhydrated hydroxylamine clusters
Source: Royal Society of Chemistry journal article supplement (doi:10.1039/c5cp07396k), 2016-01-01
Supplement: c5cp07396k15.pdf [file c5cp07396k15.pdf]

**Table S9** Kinetics of proton dissociation in the smallest intermediate complex (structure **E1-[1]**) in the  $S_1$  state obtained from BOMD simulations over the temperature range of 250-500 K. **P1** and **P2** are the dynamics for the large- and small-amplitude O-O vibrations, respectively. Lifetimes ( $\tau$ ) and first order-rate constants ( $k$ ) are in fs and  $\text{ps}^{-1}$ , respectively.

| <b>T</b> | <b>P1</b>    |          |              | <b>P2</b>    |          |            |
|----------|--------------|----------|--------------|--------------|----------|------------|
|          | $\tau_{1/2}$ | <b>k</b> | $\tau = 1/k$ | $\tau_{1/2}$ | <b>k</b> | $\tau=1/k$ |
| 250      | 51           | 13.64    | 73           | 35           | 19.72    | 51         |
| 320      | 86           | 8.08     | 124          | 48           | 14.43    | 69         |
| 350      | 106          | 6.56     | 152          | 35           | 19.85    | 50         |
| 400      | 79           | 8.80     | 114          | 50           | 13.86    | 72         |
| 500      | 68           | 10.26    | 97           | 108          | 6.40     | 156        |
