# Supplementary figures and images for: The mechanism of excited state proton dissociation in microhydrated hydroxylamine clusters
Source: Royal Society of Chemistry journal article supplement (doi:10.1039/c5cp07396k), 2016-01-01

**a)**

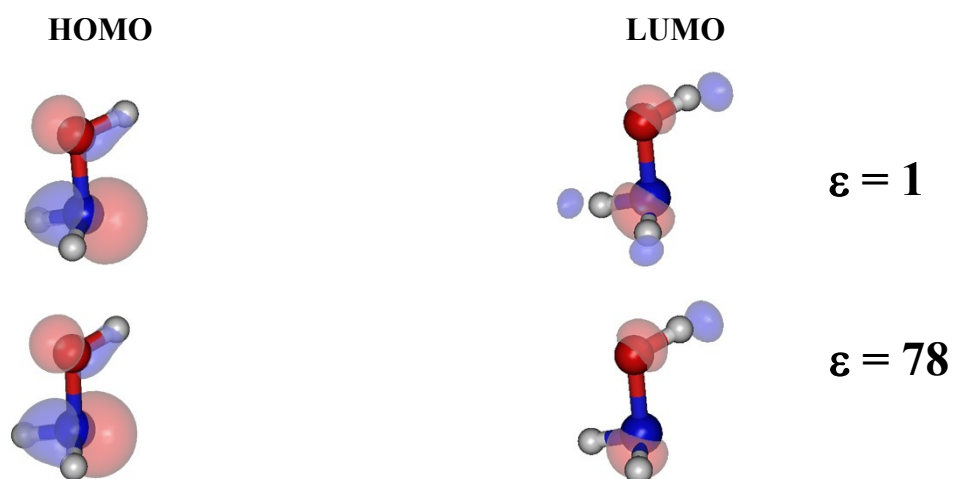

**Figure S1a**

Supplement: c5cp07396k1.pdf [file c5cp07396k1.pdf]

$\epsilon = 1$

**b)**

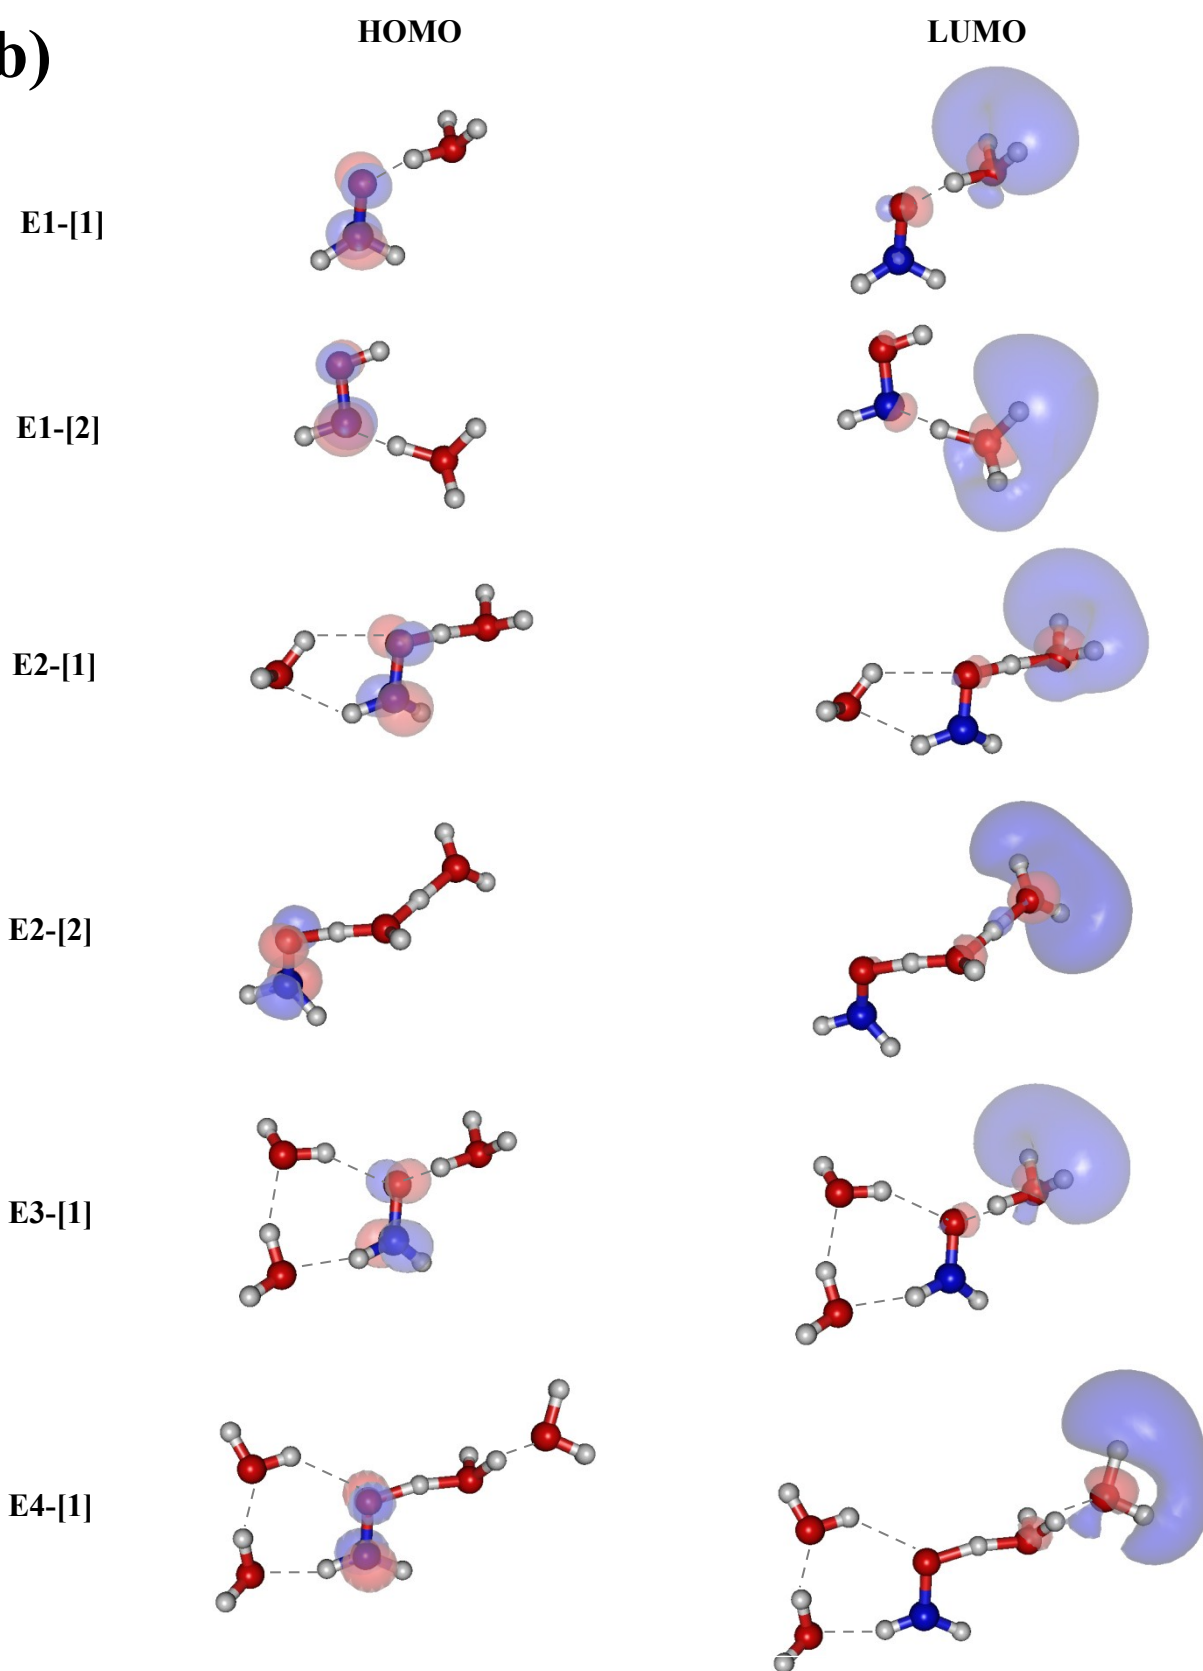

**Figure S1b**

Supplement: c5cp07396k2.pdf [file c5cp07396k2.pdf]

$\epsilon = 78$

c)

HOMO

LUMO

E1-[1]

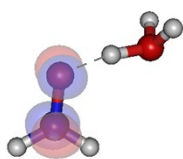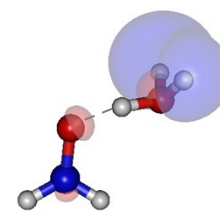

E1-[2]

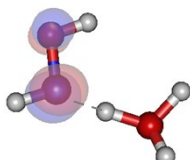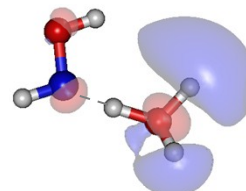

E2-[1]

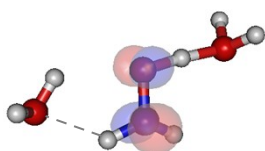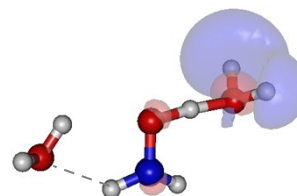

E2-[2]

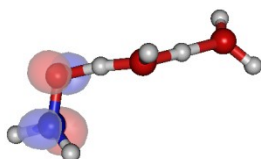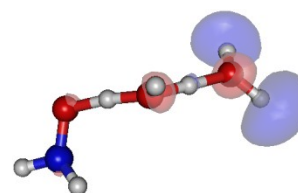

E3-[1]

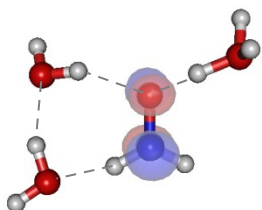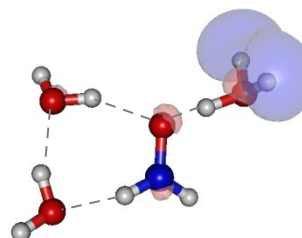

E4-[1]

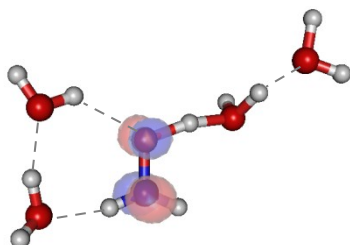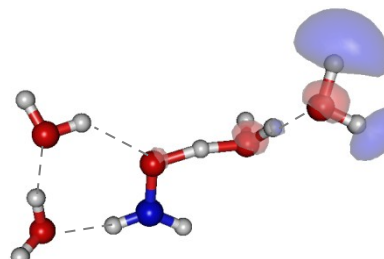

Figure S1c

Supplement: c5cp07396k3.pdf [file c5cp07396k3.pdf]

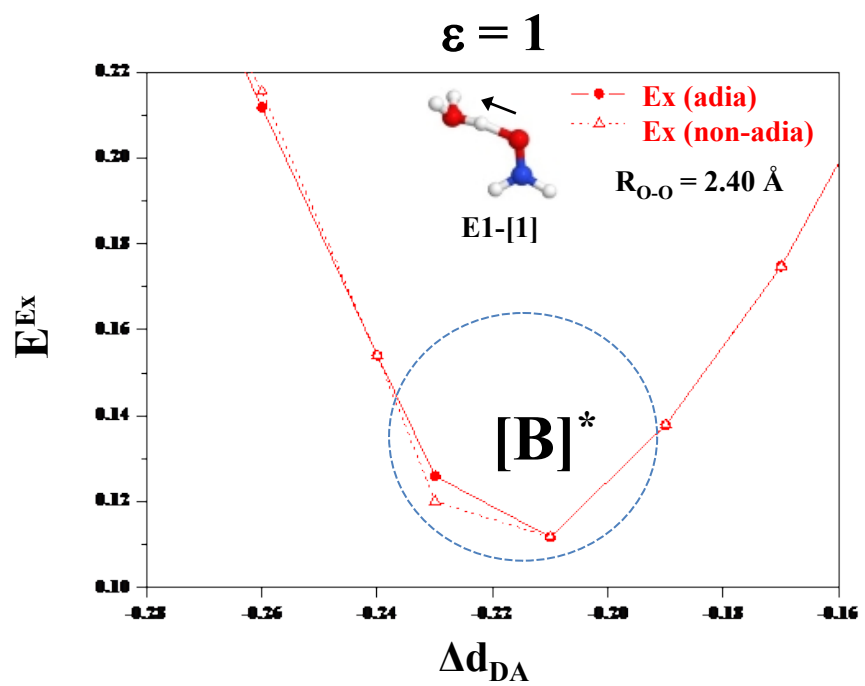

Figure S2

Supplement: c5cp07396k4.pdf [file c5cp07396k4.pdf]

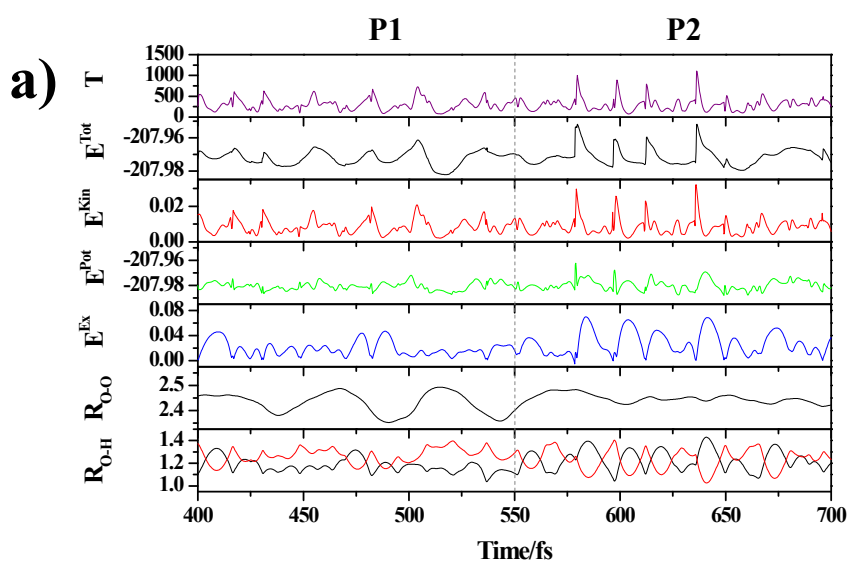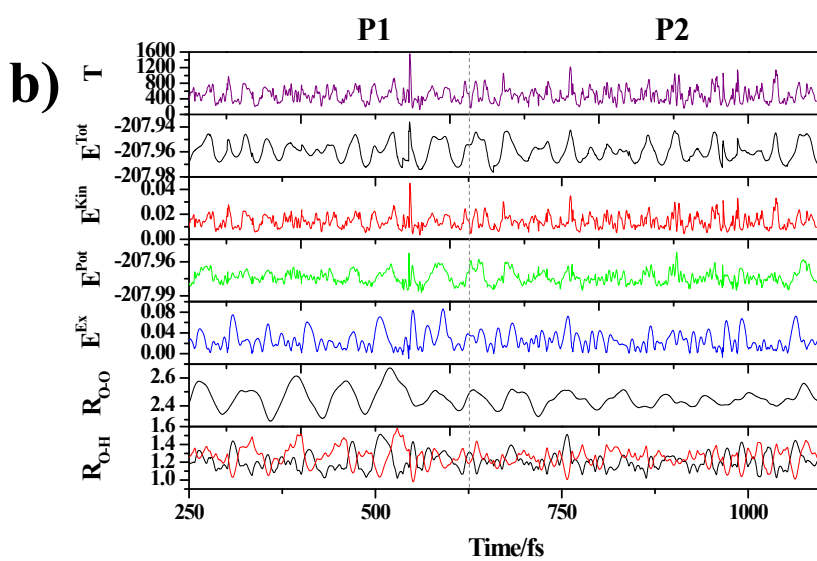

**Figures S3a-b**

Supplement: c5cp07396k5.pdf [file c5cp07396k5.pdf]
